# Supplementary material
Source: MDPI journal article supplement (https://www.mdpi.com/2073-4441/13/20/2824)
Supplement: s1 [file s1]

## Supplementary material

**Table S1.** Results of physical chemical parameters not showed in the Piper diagram (**Figure 1**), expressed in the respective unit of measure, for the six mineral bottled water brands examined in the study.

| Parameter              | Unit of measurement | Sample Code |      |      |      |       |      |
|------------------------|---------------------|-------------|------|------|------|-------|------|
|                        |                     | Sparkling   |      |      | Flat |       |      |
|                        |                     | A           | D    | E    | B    | C     | F    |
| Nitrates               | mg/L                | 2           | 7.1  | 3    | 3.4  | 1     | 8    |
| Fluorides              | mg/L                | 1.2         | 1    | 1    | 0.11 | < 0.1 | 1    |
| Total dissolved solids | mg/L                | 745         | 1308 | 1156 | 262  | 225   | 393  |
| Conductivity           | μS/cm               | 1104        | 1780 | 1504 | 460  | 322   | 454  |
| pH                     | -                   | 5.8         | 6.17 | 5.9  | 7.01 | 7.67  | 6.66 |
| Free CO <sub>2</sub>   | mg/L                | 1485        | 1950 | 2900 | 18   | 41.6  | 108  |

**Table S2.** Microorganisms identified with Sanger sequencing in samples B, C, and F from shelf-life evaluation in winter season and isolated both in sample storage at variable temperature (VT) and at constant temperature (CT). [AE: aerobe; AN: anaerobe; FA: facultative aerobe; T: growth temperature; M: mesophilic; P: Proteobacteria]. In the “Main sources of isolation” column, whereas germs were previously isolated from mineral waters, it was evidenced in **bold**.

| Sample    | Microorganism                       | Day of isolation/ storage condition | Microorganism characteristics |      |   |                       |    |    | Main sources of isolation       |       |
|-----------|-------------------------------------|-------------------------------------|-------------------------------|------|---|-----------------------|----|----|---------------------------------|-------|
|           |                                     |                                     | Phylum                        | Gram | T | O <sub>2</sub> levels |    |    |                                 | Spore |
|           |                                     |                                     |                               |      |   | AE                    | AN | FA |                                 |       |
| B<br>Flat | <i>Pseudomonas fluorescens</i>      | d0                                  | P                             | -    | M | X                     |    |    | Soil, <b>water</b> [24]         |       |
|           | <i>Pseudomonas veronii</i>          | d0                                  | P                             | -    | M | X                     |    |    | <b>Mineral water</b> [25]       |       |
|           | <i>Rhodoferax saidenbachensis</i>   | d0                                  | P                             | -    | M | X                     |    |    | Sediment [26]                   |       |
|           | <i>Stenotrophomonas maltophilia</i> | d0                                  | P                             | -    | M | X                     |    |    | <b>Bottled water</b> [27]       |       |
|           | <i>Acidovorax delafieldii</i>       | d0-d5-10/CT                         | P                             | -    | M | X                     |    |    | Soil, <b>water</b> [28]         |       |
|           | <i>Aquabacterium parvum</i>         | d5/VT                               | P                             | -    | M | X                     |    |    | <b>Water</b> [29]               |       |
|           | <i>Caulobacter henricii</i>         | d5/VT                               | P                             | -    | M | X                     |    |    | <b>Water</b> [30]               |       |
|           | <i>Brevundimonas vesicularis</i>    | d15/CT                              | P                             | -    | M | X                     |    |    | Environment [31]                |       |
|           | <i>Acidovorax facilis</i>           | d30/CT<br>d5/VT                     | P                             | -    | M | X                     |    |    | Soil [32]                       |       |
|           | <i>Rhodoferax saidenbachensis</i>   | d30/CT<br>d5/VT                     | P                             | -    | M | X                     |    |    | Sediment [26]                   |       |
|           | <i>Delftia acidovorans</i>          | d0                                  | P                             | -    | M | X                     |    |    | <b>Fresh water, soil</b> [33]   |       |
|           | <i>Delftia lacustris</i>            | d0                                  | P                             | -    | M | X                     |    |    | <b>Water</b> [34]               |       |
|           | <i>Pantoea agglomerans</i>          | d0                                  | P                             | -    | M | X                     |    |    | Plants surface, seeds, man [35] |       |
|           | <i>Acidovorax radialis</i>          | d0-d10-30/CT<br>d30/VT              | P                             | -    | M | X                     |    |    | Wheat root [36]                 |       |
|           | <i>Sphingomonas aquatilis</i>       | d15/CT                              | P                             | -    | M | X                     |    |    | <b>Mineral water</b> [37]       |       |
|           | <i>Brevundimonas mediterranea</i>   | d30/VT                              | P                             | -    | M | X                     |    |    | <b>Sea water</b> [38]           |       |
| F<br>Flat | <i>Pseudomonas extremaustralis</i>  | d0                                  | P                             | -    | M | X                     |    |    | <b>Water</b> [39]               |       |
|           | <i>Pseudomonas veronii</i>          | d0                                  | P                             | -    | M | X                     |    |    | <b>Mineral water</b> [25]       |       |
|           | <i>Acidovorax delafieldii</i>       | d0- d5-10-15-30/CT<br>d10-30/VT     | P                             | -    | M | X                     |    |    | <b>Water, soil</b> [28]         |       |
|           | <i>Stenotrophomonas maltophilia</i> | d0                                  | P                             | -    | M | X                     |    |    | <b>Bottled water</b> [27]       |       |

**Table S3.** Microorganisms identified with Sanger sequencing in samples B, C, and F from shelf-life evaluation in spring season and isolated both in sample storage at variable temperature (VT) and at constant temperature (CT). [AE: aerobe; AN: anaerobe; FA: facultative aerobe; T: growth temperature; M: mesophilic; B: Bacteroidetes; P: Proteobacteria]. In the “Main sources of isolation” column, whereas germs were previously isolated from mineral waters, it was evidenced in **bold**.

| Sample                              | Microorganism                       | Day of isolation/ storage condition | Microorganism characteristics |      |   |                       |    |    | Main source of isolation       |                   |
|-------------------------------------|-------------------------------------|-------------------------------------|-------------------------------|------|---|-----------------------|----|----|--------------------------------|-------------------|
|                                     |                                     |                                     | Phylum                        | Gram | T | O <sub>2</sub> levels |    |    |                                | Spore             |
|                                     |                                     |                                     |                               |      |   | AE                    | AN | FA |                                |                   |
| B Flat                              | <i>Acidovorax delafieldii</i>       | d0                                  | P                             | -    | M | X                     |    |    | Soil, <b>water</b> [28]        |                   |
|                                     | <i>Pseudomonas fluorescens</i>      | d0                                  | P                             | -    | M | X                     |    |    | Soil, <b>water</b> [24]        |                   |
|                                     | <i>Pseudomonas veronii</i>          | d0                                  | P                             | -    | M | X                     |    |    | <b>Mineral water</b> [25]      |                   |
|                                     | <i>Stenotrophomonas maltophilia</i> | d0                                  | P                             | -    | M | X                     |    |    | <b>Bottled water</b> [27]      |                   |
|                                     | <i>Rhodoferax saidenbachensis</i>   | d0-d15/VT                           | P                             | -    | M | X                     |    |    | Sediment [26]                  |                   |
|                                     | <i>Ensifer adhaerens</i>            | d5-10/CT                            | P                             | -    | M | X                     |    |    | Soil [40]                      |                   |
|                                     | <i>Flavobacterium succinicans</i>   | d30/VT                              |                               |      |   |                       |    |    |                                |                   |
|                                     |                                     | d5-10/VT                            | B                             | -    | M | X                     |    |    | <b>Marine water</b> [41]       |                   |
|                                     | <i>Pseudomonas alcaligenes</i>      | d5-10/CT                            | P                             | -    | M | X                     |    |    | <b>Water</b> , soil [42]       |                   |
|                                     |                                     | d15/VT                              |                               |      |   |                       |    |    |                                |                   |
|                                     | <i>Sphingopyxis ginsengisoli</i>    | d5-30/CT                            | P                             | -    | M | X                     |    |    | Soil [43]                      |                   |
|                                     |                                     | d30/VT                              |                               |      |   |                       |    |    |                                |                   |
|                                     | <i>Aquabacterium commune</i>        | d10/CT                              | P                             | -    | M | X                     |    |    | <b>Water</b> [29]              |                   |
|                                     | <i>Delftia acidovorans</i>          | d10/CT                              | P                             | -    | M | X                     |    |    | <b>Fresh water</b> , soil [33] |                   |
|                                     | C Flat                              | <i>Blastomonas natatoria</i>        | d15/CT                        | P    | - | M                     | X  |    |                                | <b>Water</b> [44] |
| <i>Pseudoxanthomonas mexicana</i>   |                                     | d30/VT                              |                               |      |   |                       |    |    |                                |                   |
|                                     |                                     | d 15/CT                             | P                             | -    | M | X                     |    |    | Sludge [45]                    |                   |
| <i>Sphingopyxis soli</i>            |                                     | d15/CT                              | P                             | -    | M | X                     |    |    | Soil [46]                      |                   |
|                                     |                                     | d5/VT                               |                               |      |   |                       |    |    |                                |                   |
| <i>Delftia acidovorans</i>          |                                     | d0                                  | P                             | -    | M | X                     |    |    | <b>Fresh water</b> , soil [33] |                   |
| <i>Delftia lacustris</i>            |                                     | d0                                  | P                             | -    | M | X                     |    |    | <b>Water</b> [34]              |                   |
| <i>Pantoea agglomerans</i>          |                                     | d0                                  | P                             | -    | M | X                     |    |    | Plants surface, seeds [35]     |                   |
| <i>Acidovorax radialis</i>          |                                     | d0-d10-15-30/CT<br>d10-15-30/VT     | P                             | -    | M | X                     |    |    | Roots [36]                     |                   |
| <i>Stenotrophomonas maltophilia</i> |                                     | d30/VT                              | P                             | -    | M | X                     |    |    | <b>Bottled water</b> [27]      |                   |
| F Flat                              | <i>Acidovorax delafieldii</i>       | d0                                  | P                             | -    | M | X                     |    |    | <b>Water</b> , soil [28]       |                   |
|                                     | <i>Pseudomonas extremaustralis</i>  | d0                                  | P                             | -    | M | X                     |    |    | <b>Water</b> [39]              |                   |
|                                     | <i>Pseudomonas veronii</i>          | d0                                  | P                             | -    | M | X                     |    |    | <b>Mineral water</b> [25]      |                   |
|                                     | <i>Stenotrophomonas maltophilia</i> | d0-d30/CT                           | P                             | -    | M | X                     |    |    | <b>Bottled water</b> [27]      |                   |
|                                     | <i>Blastomonas natatoria</i>        | d15/CT                              | P                             | -    | M | X                     |    |    | <b>Water</b> [44]              |                   |

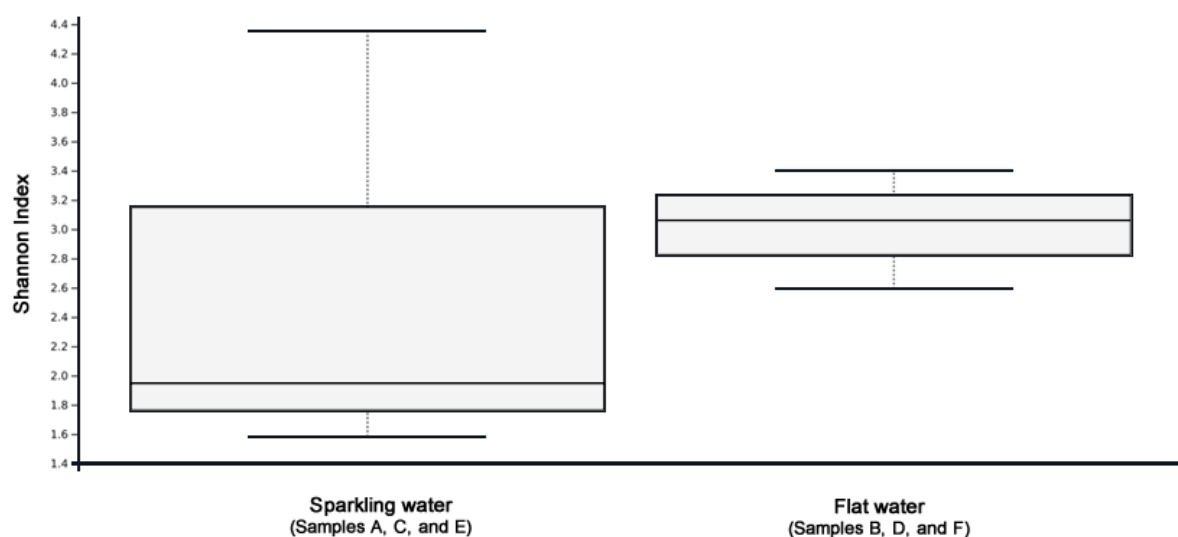

**Figure S1.** Changes in the Shannon index of diversity based on the number of 16S rRNA Illumina reads.

**a) Phylum**

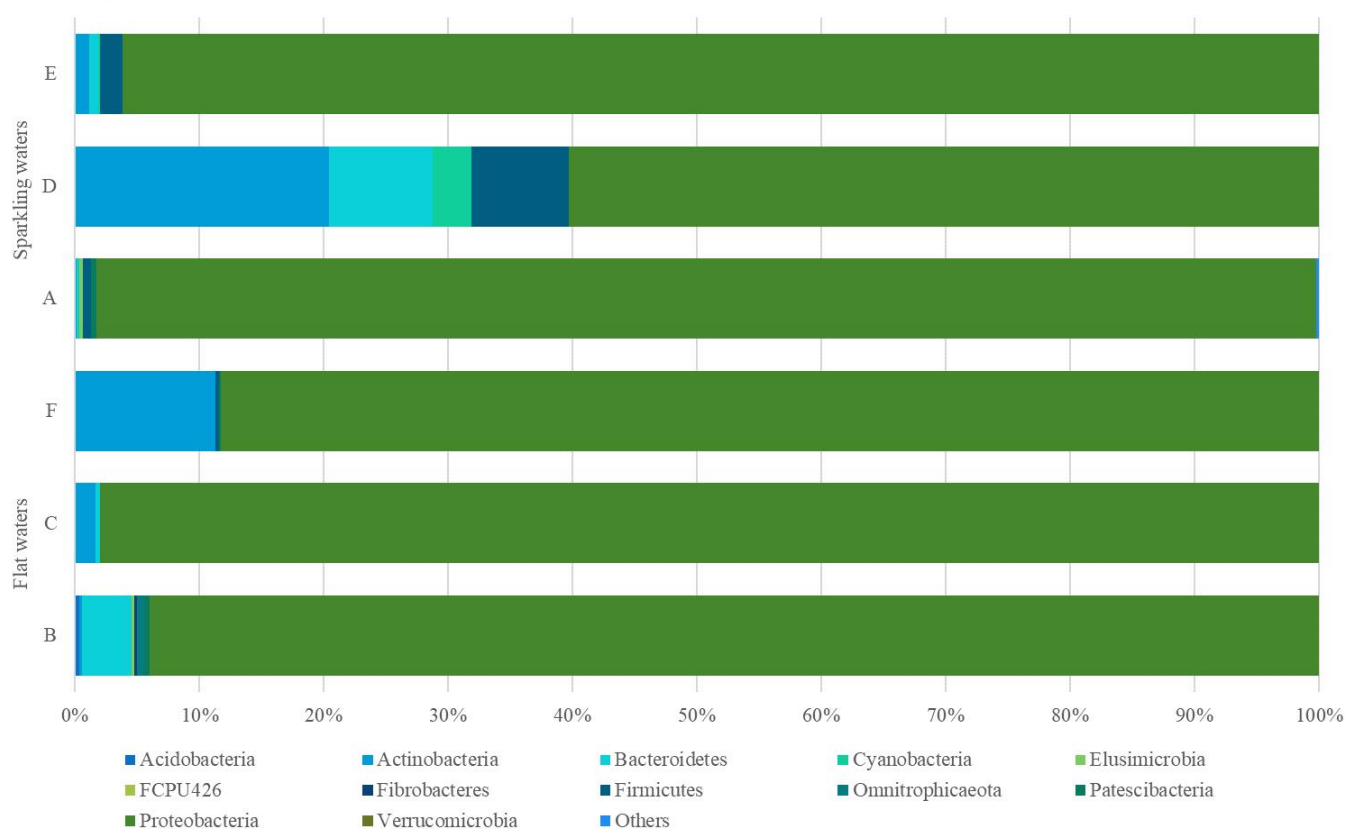

**Figure S2.** Community structure of the mineral water brands at Phylum level according to 16s rRNA sequencing analysis. Results are expressed as relative abundance of reads.

## b) Order

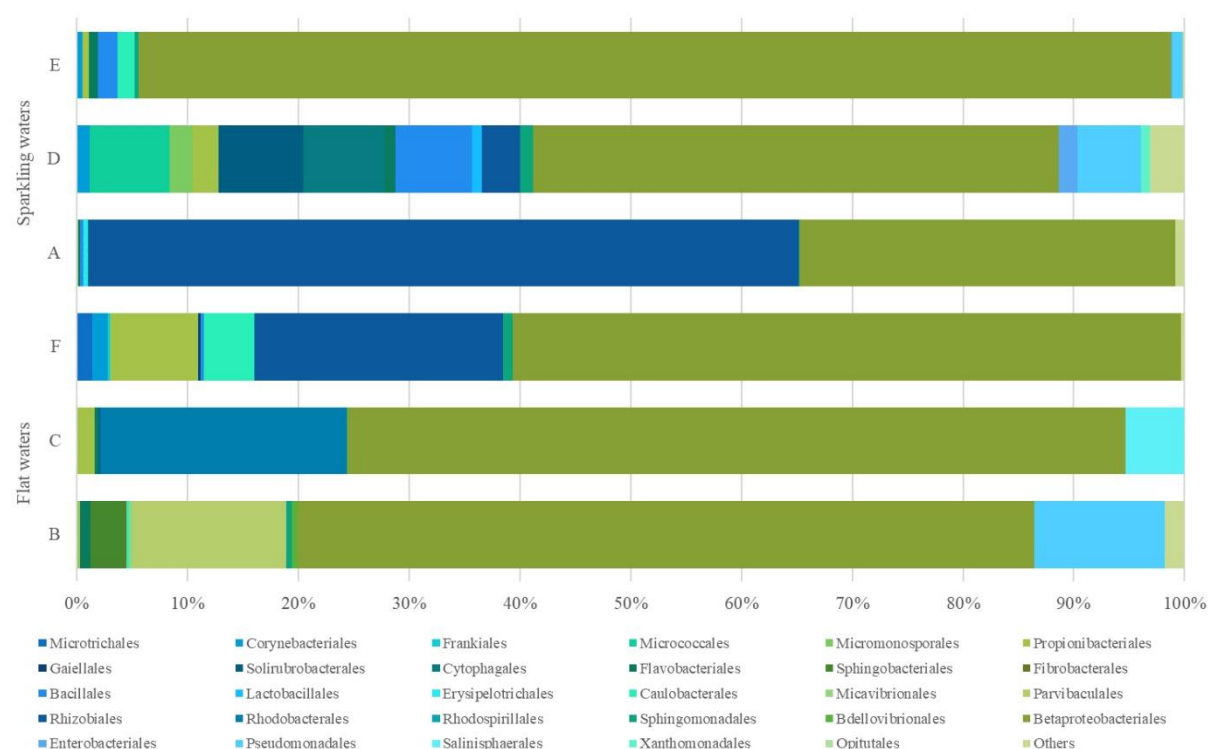

**Figure S3.** Community structure of the mineral water brands at Order level according to 16s rRNA sequencing analysis. Results are expressed as relative abundance of reads.

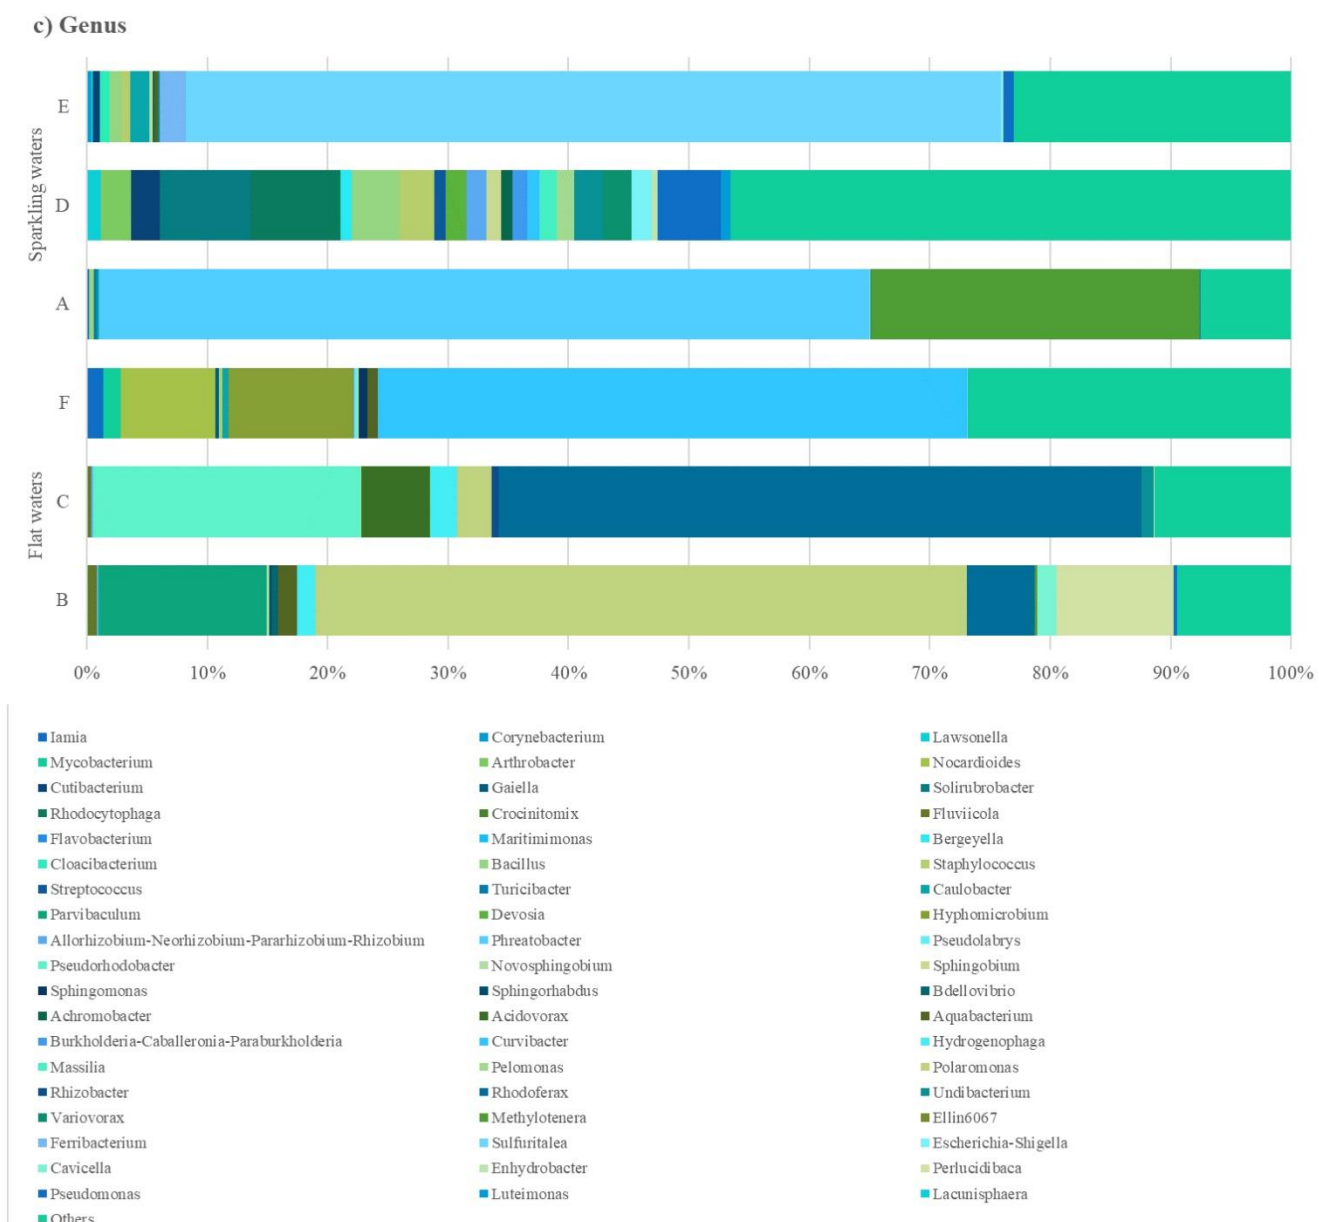

**Figure S4.** Community structure of the mineral water brands at Genus level according to 16s rRNA sequencing analysis. Results are expressed as relative abundance of reads.

## References

24. Elomari, M.; Coroler, L.; Hoste, B.; Gillis, M.; Izard, D.; Leclerc, H. DNA Relatedness among *Pseudomonas* Strains Isolated from Natural Mineral Waters and Proposal of *Pseudomonas veronii* sp. nov. *Int. J. Syst. Bacteriol.* **1996**, *46*, 1138–1144.
25. Kaden, R.; Spröer, C.; Beyer, D.; Krolla-Sidenstein, P. *Rhodoferrax saidenbachensis* sp. nov., a psychrotolerant, very slowly growing bacterium within the family *Comamonadaceae*, proposal of appropriate taxonomic position of *Albidiferrax ferrireducens* strain T118T in the genus *Rhodoferrax* and emended description of the genus *Rhodoferrax*. *Int. J. Syst. Evol. Microbiol.* **2014**, *64*, 1186–1193.
26. Brooke, J.S. *Stenotrophomonas maltophilia*: An Emerging Global Opportunistic Pathogen. *Clin. Microbiol. Rev.* **2012**, *25*, 2–41.
27. Khan, S.T.; Horiba, Y.; Yamamoto, M.; Hiraishi, A. Members of the family *Comamonadaceae* as primary poly(3-hydroxybutyrate-co-3-hydroxyvalerate)-degrading denitrifiers in activated sludge as revealed by a polyphasic approach. *Appl. Environ. Microbiol.* **2002**, *68*, 3206–3214.
28. Kalmbach, S.; Manz, W.; Wecke, J.; Szewzyk, U. *Aquabacterium* gen. nov., with description of *Aquabacterium citratiphilum* sp. nov., *Aquabacterium parvum* sp. nov. and *Aquabacterium commune* sp. nov., three in situ dominant bacterial species from the Berlin drinking water system. *Int. J. Syst. Bacteriol.* **1999**, *49*, 769–777.
29. Sun, L.N.; Yang, E.N.; Hou, X.T.; Wei, J.C.; Yuan, Z.X.; Wang, W.Y. *Caulobacter rhizosphaerae* sp. nov., a stalked bacterium isolated from rhizosphere soil. *Int. J. Syst. Evol. Microbiol.* **2017**, *67*, 1771–1776.
30. Shang, S.A.; Chiu, S.K.; Chan, M.C.; Wang, N.C.; Yang, Y.S.; Lin, J.C.; Chang, F.Y. Invasive *Brevundimonas vesicularis* bacteremia: Two case reports and review of the literature. *J. Microbiol. Immunol. Infect.* **2012**, *45*, 468–472.
31. Willems, A.; Falsen, E.; Pot, B.; Jantzen, E.; Hoste, B.; Vandamme, P.; Gillis, M.; Kersters, K.; De Ley, J. *Acidovorax*, a new genus for *Pseudomonas facilis*, *Pseudomonas delafieldii*, E. FALSEN (EF) group 13, EF group 16, and several clinical isolates, with the species *Acidovorax facilis* comb. nov., *Acidovorax delafieldii* comb. nov., and *Acidovorax temperans* comb. nov. *Int. J. Syst. Bacteriol.* **1990**, *40*, 384–398.
32. Wen, A.; Fegan, M.; Hayward, C.; Chakraborty, S.; Sly, L.I. Phylogenetic relationships among members of the *Comamonadaceae*, and description of *Delftia acidovorans* (den Dooren de Jong 1926 and Tarnaoka et al. 1987) gen. nov., comb. nov. *Int. J. Syst. Bacteriol.* **1999**, *49*, 567–576.
33. Jørgensen, N.O.G.; Brandt, K.K.; Nybroe, O.; Hansen, M. *Delftia lacustris* sp. nov., a peptidoglycan-degrading bacterium from fresh water, and emended description of *Delftia tsuruhatensis* as a peptidoglycan-degrading bacterium. *Int. J. Syst. Evol. Microbiol.* **2009**, *59*, 2195–2199.
34. Gavini, F.; Mergaert, J.; Beji, A.; Mielcarek, C.; Izard, D.; Kersters, K.; De Ley, J. Transfer of *Enterobacter agglomerans* (Beijerinck 1888) Ewing and Fife 1972 to *Pantoea* gen. nov. as *Pantoea agglomerans* comb. nov. and Description of *Pantoea dispersa* sp. nov. *Int. J. Syst. Bacteriol.* **1989**, *39*, 337–345.
35. Li, D.; Rothballer, M.; Schmid, M.; Esperschütz, J.; Hartmann, A. *Acidovorax radialis* sp. nov., a wheat-root-colonizing bacterium. *Int. J. Syst. Evol. Microbiol.* **2011**, *61*, 2589–2594.
36. Lee, J.S.; Shin, Y.K.; Yoon, J.H.; Takeuchi, M.; Pyun, Y.R.; Park, Y.H. *Sphingomonas aquatilis* sp. nov., *Sphingomonas koreensis* sp. nov. and *Sphingomonas taenionensis* sp. nov., yellow-pigmented bacteria isolated from natural mineral water. *Int. J. Syst. Evol. Microbiol.* **2001**, *51*, 1491–1498.
37. Fritz, I.; Strömpl, C.; Nikitin, D.I.; Lysenko, A.M.; Abraham, W.R. *Brevundimonas mediterranea* sp. nov., a non-stalked species from the Mediterranean Sea. *Int. J. Syst. Evol. Microbiol.* **2005**, *55*, 479–486.
38. López, N.I.; Pettinari, M.J.; Stackebrandt, E.; Tribelli, P.M.; Pötter, M.; Steinbüchel, A.; Méndez, B. *Pseudomonas extremaustralis* sp. nov. a poly(3-hydroxybutyrate) producer isolated from an Antarctic environment. *Curr. Microbiol.* **2009**, *59*, 514–519.
39. Casida, Jr. L. E. *Ensifer adhaerens* gen. nov., sp. nov.: A bacterial predator of bacteria in soil. *Int. J. Syst. Evol. Microbiol.* **1982**, *32*, 339–345.
40. Poehlein, A.; Najdenski, H.; Simeonovab, D.D. Draft Genome Sequence of *Flavobacterium succinicans* Strain DD5b. *Genome Announc.* **2017**, *5*, e01492-16.
41. Suzuki, M.; Suzuki, S.; Matsui, M.; Hiraki, Y.; Kawano, F.; Shibayama, K. Genome Sequence of a strain of the Human Pathogenic Bacterium *Pseudomonas alcaligenes* That Caused Bloodstream Infection. *Genome Announc.* **2013**, *1*, e00919-13.
42. Lee, M.; Ten, L.N.; Lee, H.W.; Woo, O.H.; Im, W.T.; Lee, S.T. *Sphingopyxis ginsengisoli* sp. nov., isolated from soil of a ginseng field in South Korea. *Int. J. Syst. Evol. Microbiol.* **2008**, *58*, 2342–2347.
43. Hiraishi, A.; Kuraishi, H.; Kawahara, K. Emendation of the description of *Blastomonas natatoria* (Sly 1985) Sly and Cahill 1997 as an aerobic photosynthetic bacterium and reclassification of *Erythromonas ursincola* Yurkov et al. 1997 as *Blastomonas ursincola* comb. Nov. *Int. J. Syst. Evol. Microbiol.* **2000**, *50*, 1113–1118.
44. Thierry, S.; Macarie, H.; Lizuka, T.; Geißdörfer, W.; Assih, E.A.; Spanevello, M.; Verhe, F.; Ryosuke, P.T.; Monroy, O.; Labat, M.; et al. *Pseudoxanthomonas mexicana* sp. nov. and *Pseudoxanthomonas japonensis* sp. nov., isolated from diverse environments, and emended descriptions of the genus *Pseudoxanthomonas* Finkmann et al. 2000 and of its type species. *Int. J. Syst. Evol. Microbiol.* **2004**, *54*, 2245–2255.
45. Choi, J.H.; Kim, M.S.; Jung, M.J.; Roh, S.W.; Shin, K.S.; Bae, J.W. *Sphingopyxis soli* sp. nov., isolated from landfill soil. *Int. J. Syst. Evol. Microbiol.* **2010**, *60*, 1682–1686.
46. Sanders, J.W.E.; Sanders, C.C. *Enterobacter* spp.: Pathogens poised to flourish at the turn of the Century. *Clin. Microbiol. Rev.* **1997**, *10*, 220–241.
